# Supplementary material for: Integrated virtual screening and MD simulation study to discover potential inhibitors of mycobacterial electron transfer flavoprotein oxidoreductase
Source: PubMed Central journal article supplement (PMC11567552; doi:10.1371/journal.pone.0312860), 2024-11-15

S4 Fig. ProSA residue energies.

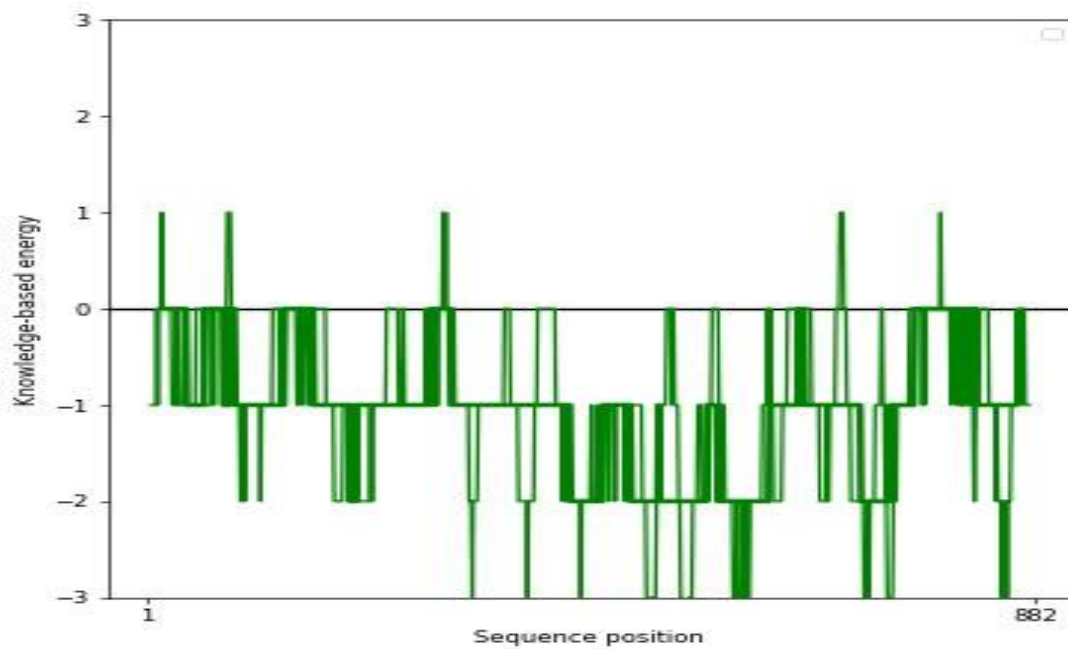

Supplement: pone.0312860.s004.pdf [file pone.0312860.s004.pdf]
