# Supplementary material for: Integrated virtual screening and MD simulation study to discover potential inhibitors of mycobacterial electron transfer flavoprotein oxidoreductase
Source: PubMed Central journal article supplement (PMC11567552; doi:10.1371/journal.pone.0312860), 2024-11-15

**S7 Fig. 2D Interactions of EtdD with diacerein, levonadifloxacin, and gatifloxacin at 0, 50, and 100 ns.** The color scheme follows that of Fig 3d.

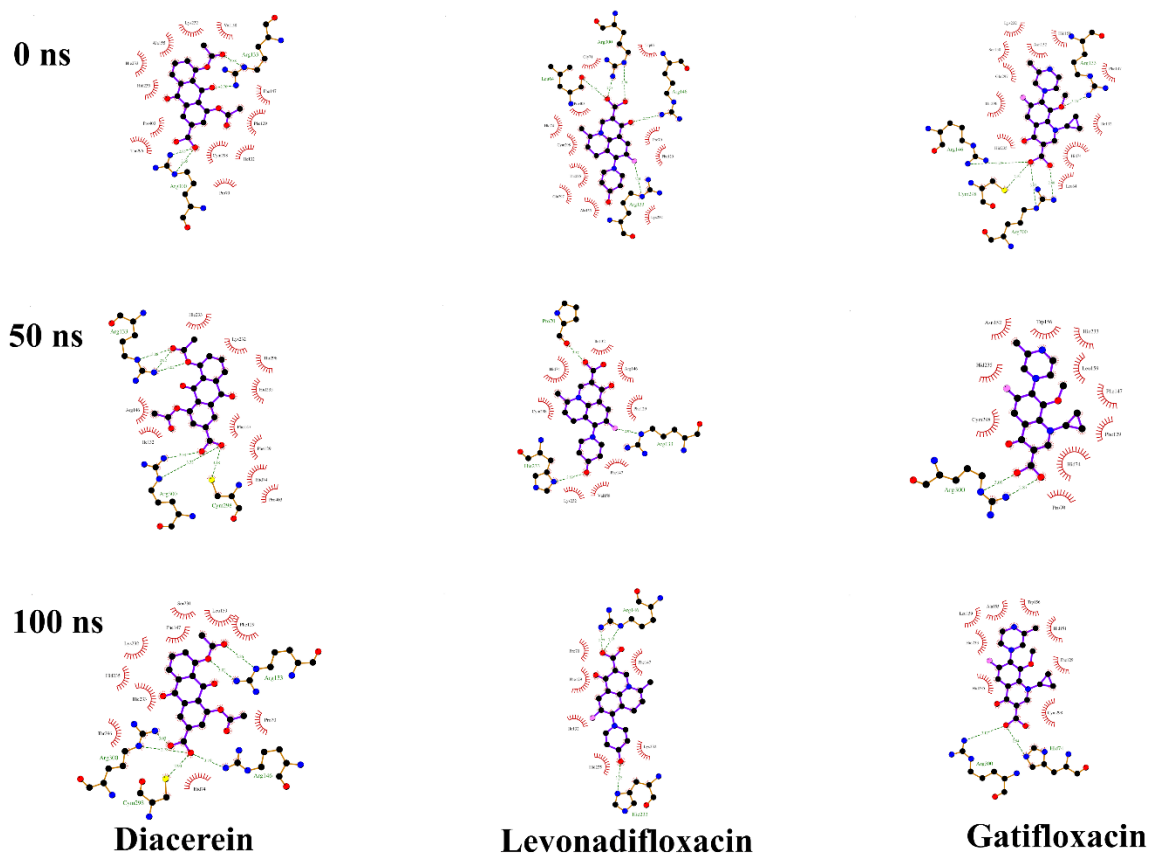

Supplement: pone.0312860.s007.pdf [file pone.0312860.s007.pdf]
